# Supplementary material
Source: PubMed Central journal article supplement (PMC4285425)

A

WT locus

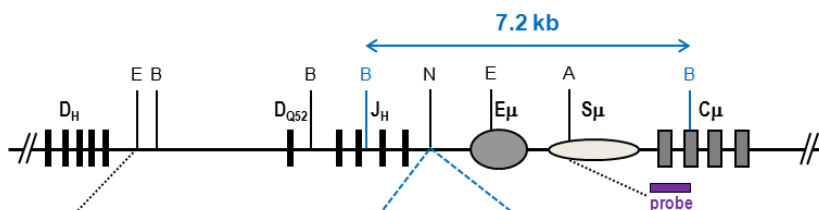

ICR targeting construct

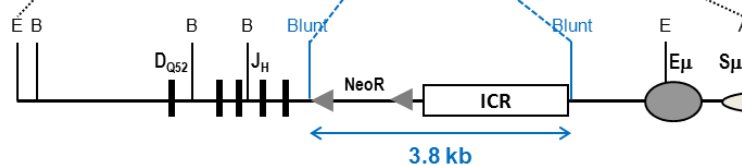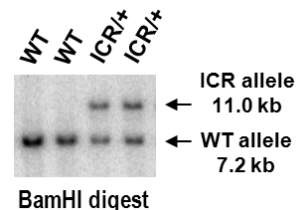

Homologous Recombination and Cre/loxP-mediated deletion of NeoR

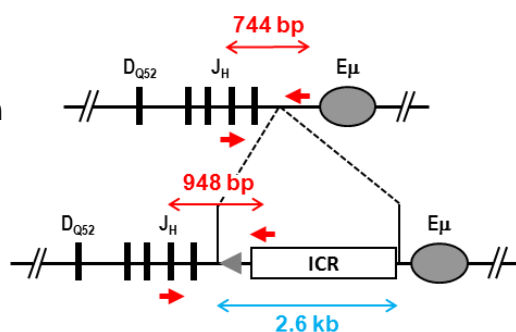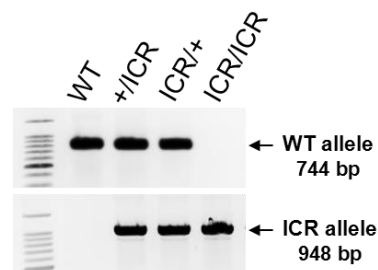

B

WT locus

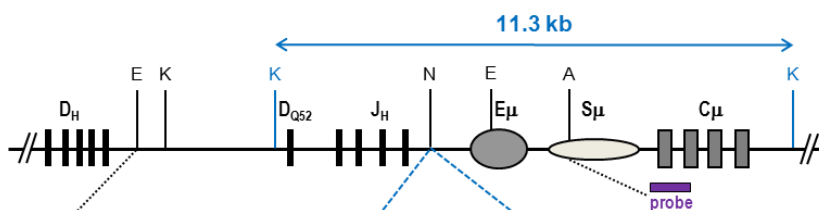

cHS4 targeting construct

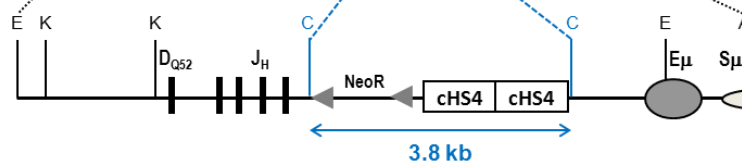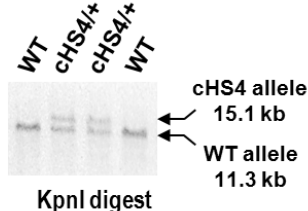

Homologous Recombination and Cre/loxP-mediated deletion of NeoR

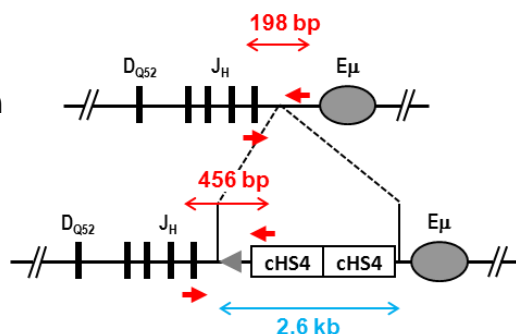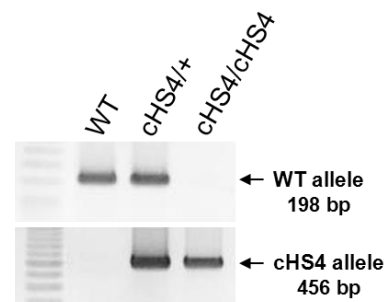

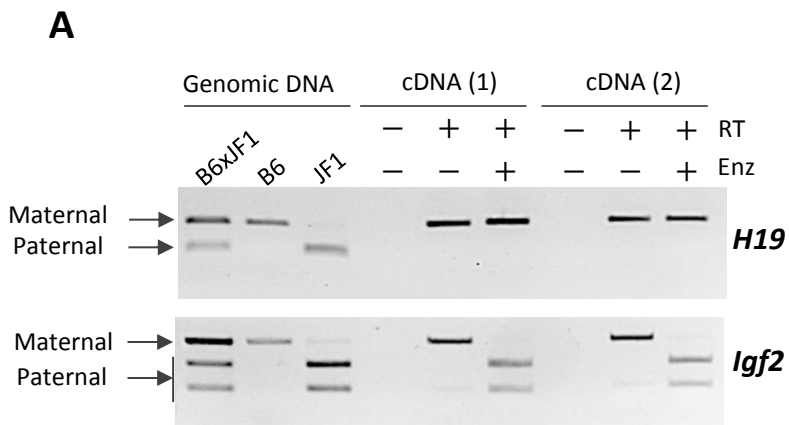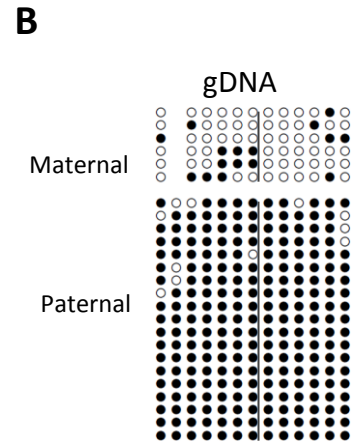

## A Bone Marrow

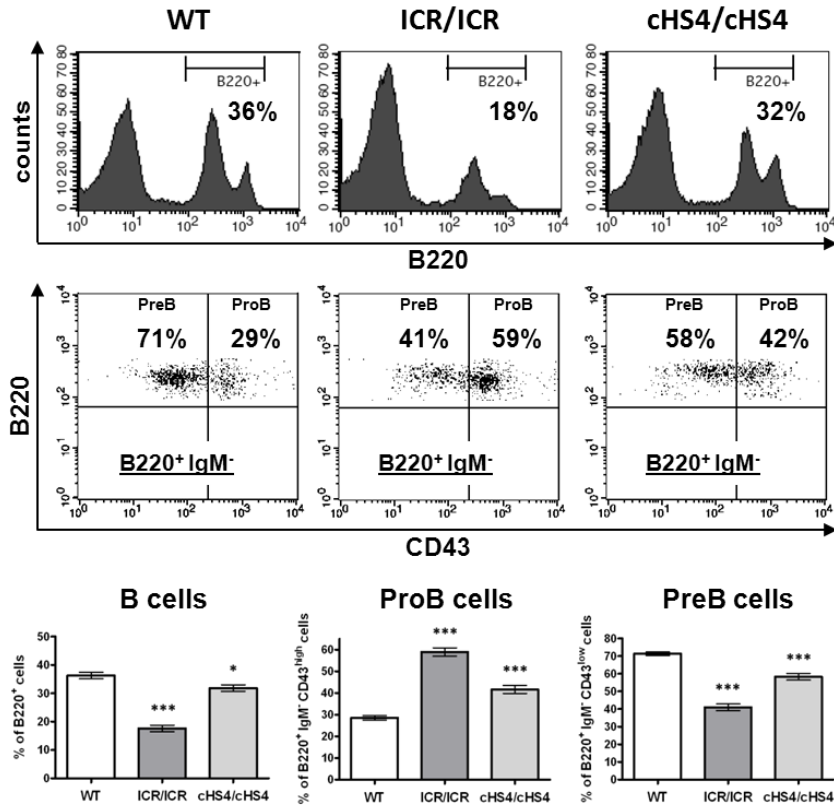

## B Spleen

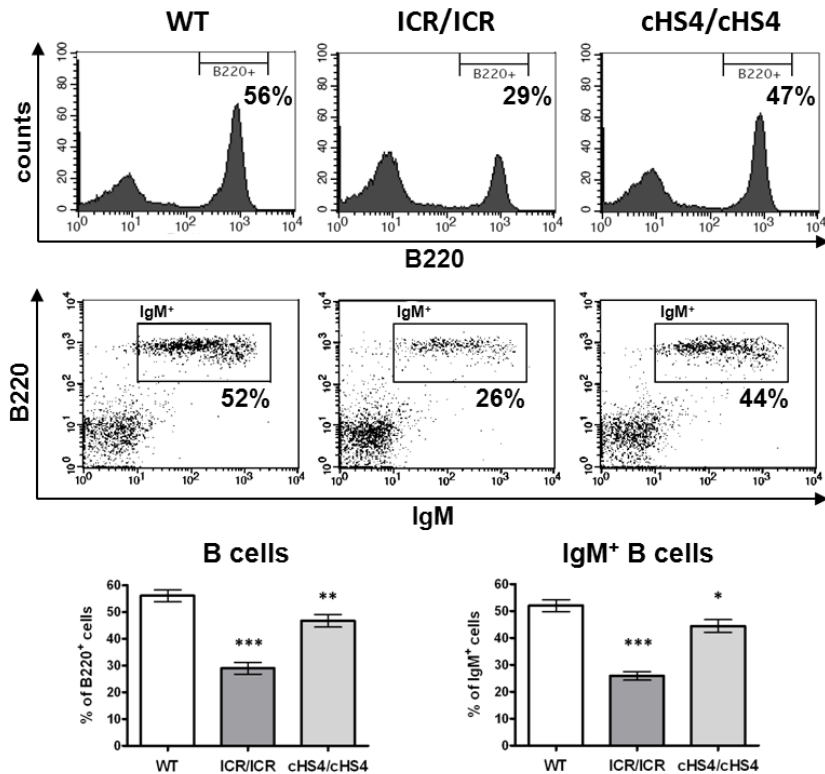

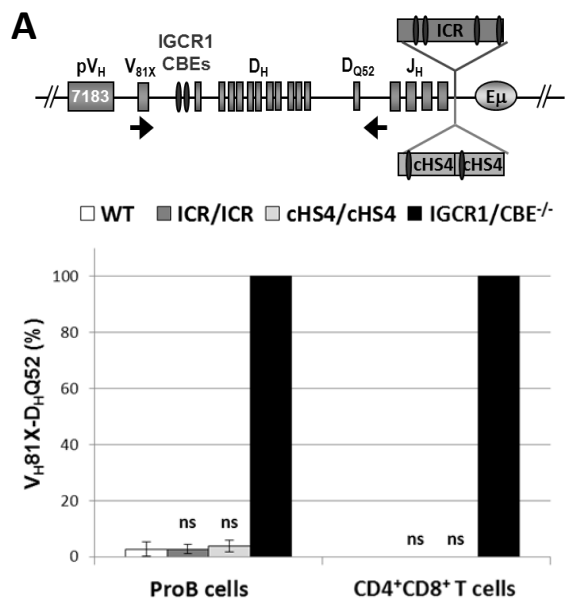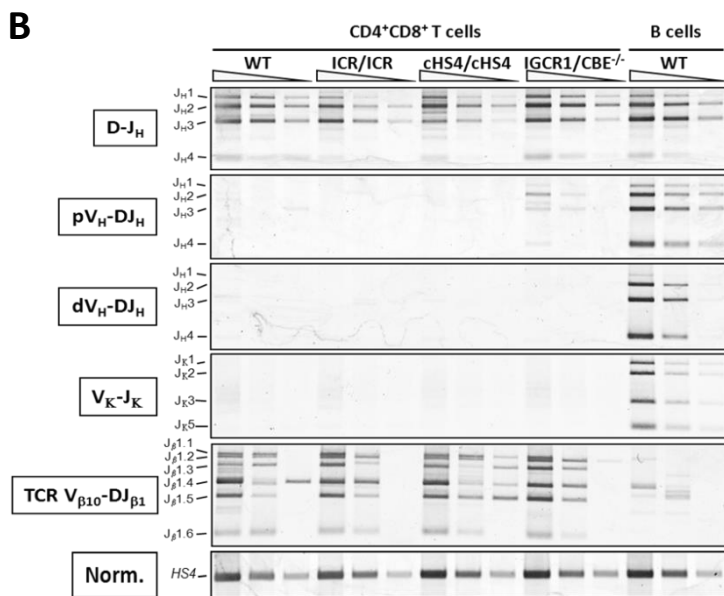

Supplement: MCB.00235-14_zmb999100715so2.pdf [file MCB.00235-14_zmb999100715so2.pdf]
